# Supplementary material for: A Randomized Clinical Trial to Evaluate the Efficacy and Safety of Co-Administration of Sitagliptin with Intensively Titrated Insulin Glargine
Source: PubMed Central journal article supplement — Diabetes Ther. 2015 Mar 28;6(2):127–42. doi: 10.1007/s13300-015-0105-3 (PMC4478181; doi:10.1007/s13300-015-0105-3), 2015-03-28

**Table S1.** Insulin Standardization: Patients on an insulin regimen other than insulin glargine once-daily in the evening had their insulin regimen modified at Week -4.

| <b>Original Insulin Regimen</b> |                  | <b>Switch to Glargine<br/>(once-daily in the evening)</b> |
|---------------------------------|------------------|-----------------------------------------------------------|
| <b>Insulin Type</b>             | <b>Regimen</b>   |                                                           |
| Glargine                        | Once-daily       | Same dose, in evening                                     |
| Glargine                        | Twice-daily      | 80% of daily dose                                         |
| Detemir                         | Once/twice daily | 70% of daily dose                                         |
| NPH                             | Once-daily       | Same dose                                                 |
| NPH                             | Twice-daily      | 70% of daily dose                                         |
| Pre-mixed                       | Once-daily       | Same dose                                                 |
| Pre-mixed                       | Twice-daily      | 70% of daily dose                                         |

**Figure S1.** Study design

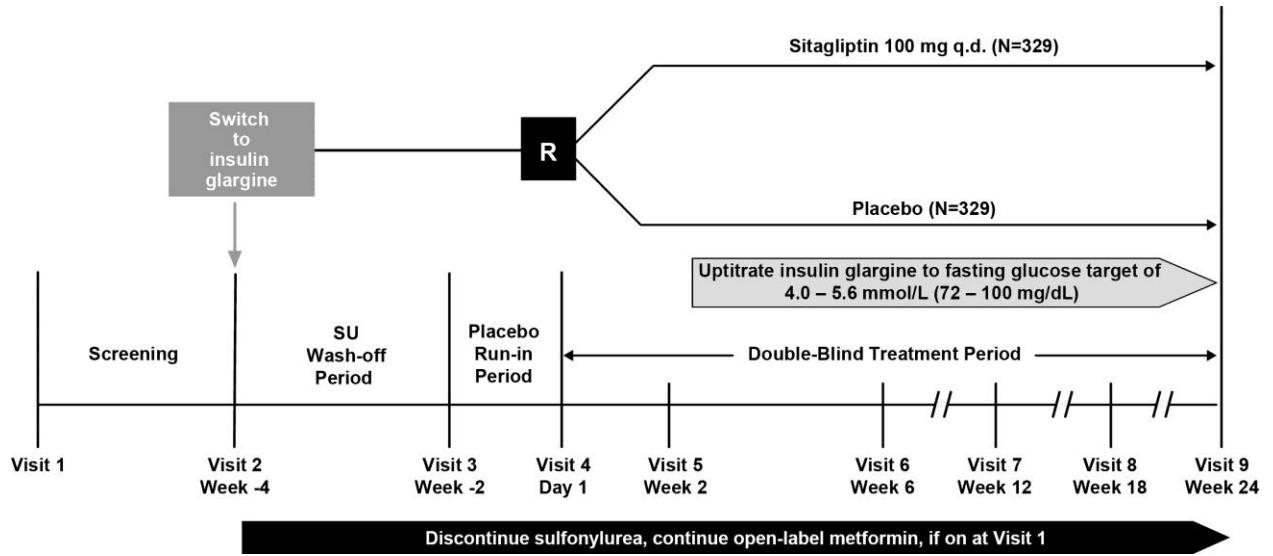

**Figure S2.** Patient disposition

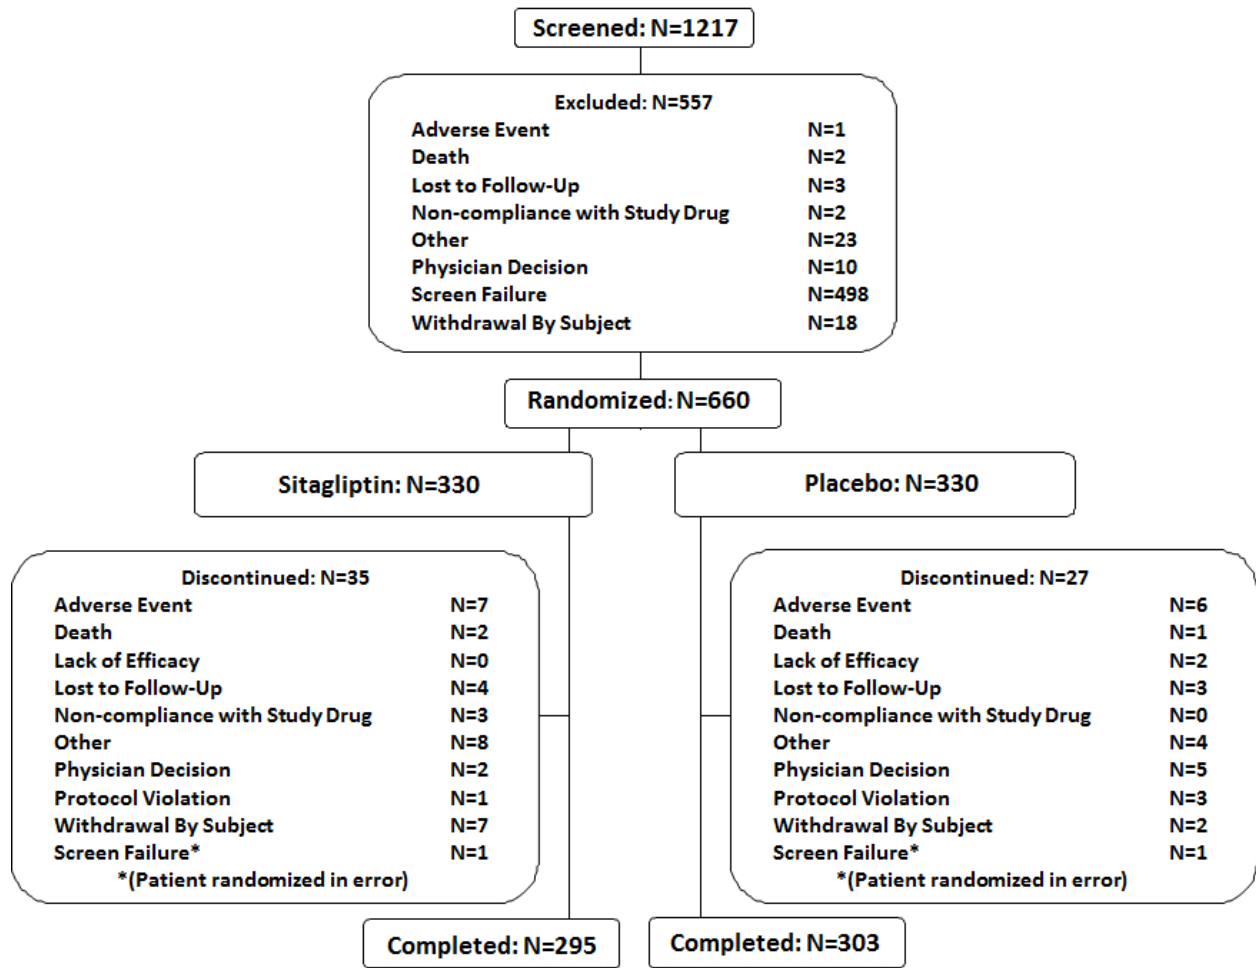

Supplement: 13300_2015_105_MOESM2_ESM.pdf [file 13300_2015_105_MOESM2_ESM.pdf]
